# Supplementary material
Source: publisher figshare collection journal article supplement (https://acs.figshare.com/ndownloader/files/4678309)

## Supporting Information

### CATECHIN DEGRADATION WITH CONCURRENT FORMATION OF HOMO- AND HETERO- CATECHIN DIMERS DURING *IN VITRO* DIGESTION.

Andrew P. Neilson, Amber S. Hopf, Bruce R. Cooper, Michael A. Pereira,

Joshua A. Bomser, Mario G. Ferruzzi

**Figures S1-S19.** CAD-MS/MS spectra (fragment ion relative abundance, % RA, versus mass-to-charge ratio,  $m/z$ ) obtained for all species detected following simulated digestion of catechins individually and/or in combination: native catechins (EGCG, **1**; ECG, **2**; EGC, **3**), catechin epimers (GC, **7**; CG, **13**), and homo- and hetero-catechin dimers ( $m/z$  913, **4** and **5**;  $m/z$  883, **6**;  $m/z$  609, **8** and **9**;  $m/z$  579, **10-12**;  $m/z$  761, **14** and **15**;  $m/z$  731, **16** and **17**;  $m/z$  897, **18** and **19**). Figure numbers refer to the corresponding compound numbers. Refer to Table 2 for compound identities and CAD parent ion collision energies. Note that the parent ion is not always observed in CAD-MS/MS spectra.

**Figures S20-S25.** HPLC-ECD elution profiles (response at 200 mV) of undigested catechin raw material (— — —), the subsequent digesta extract (———), and a digestive blank extract (no RM added) (— - - —) from EGCG (S20), EGC (S21), ECG (S22), combined EGCG-EGC (S23), combined EGCG-ECG (S24), and combined EGC-ECG (S25) raw material formulations. Peak scale is  $-0.1$ - $1.0$   $\mu$ A. Refer to Table 2 for identities of numbered peaks.

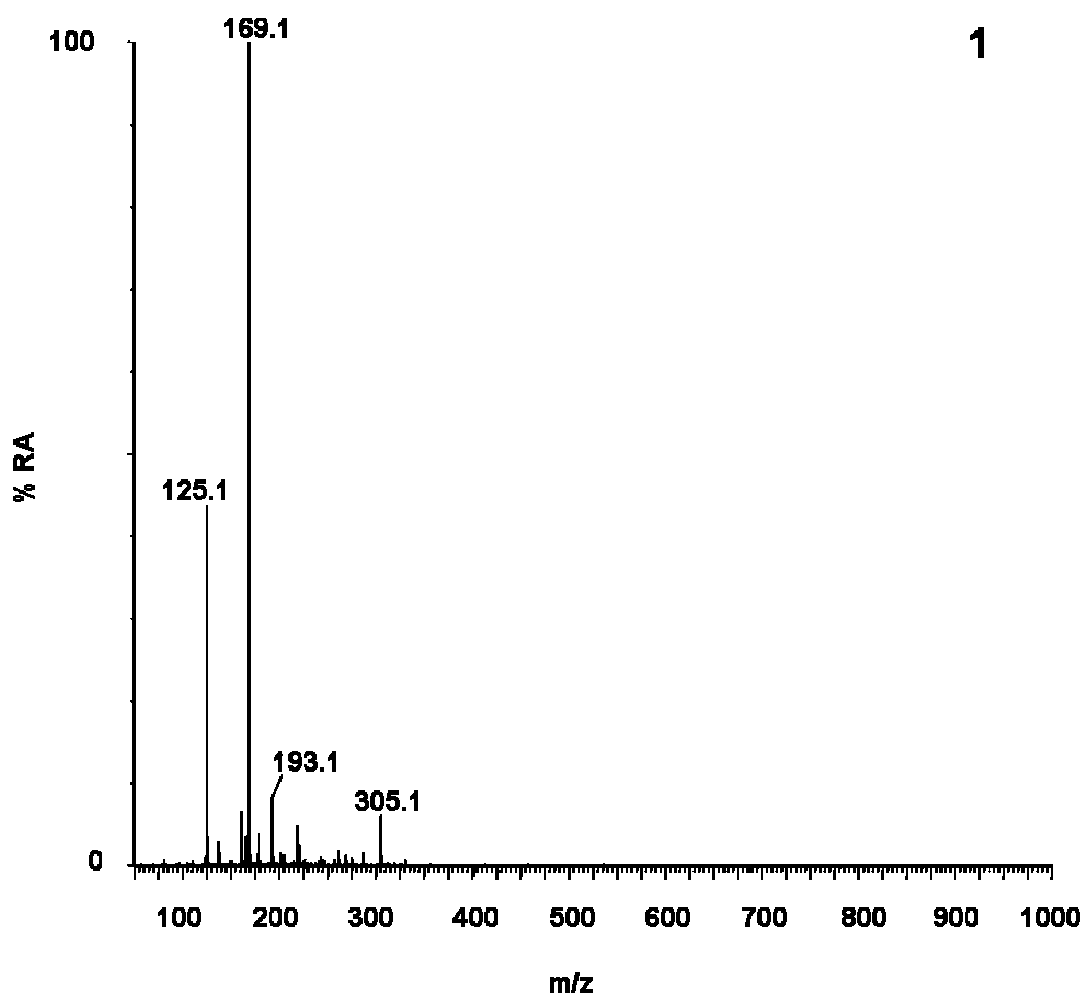

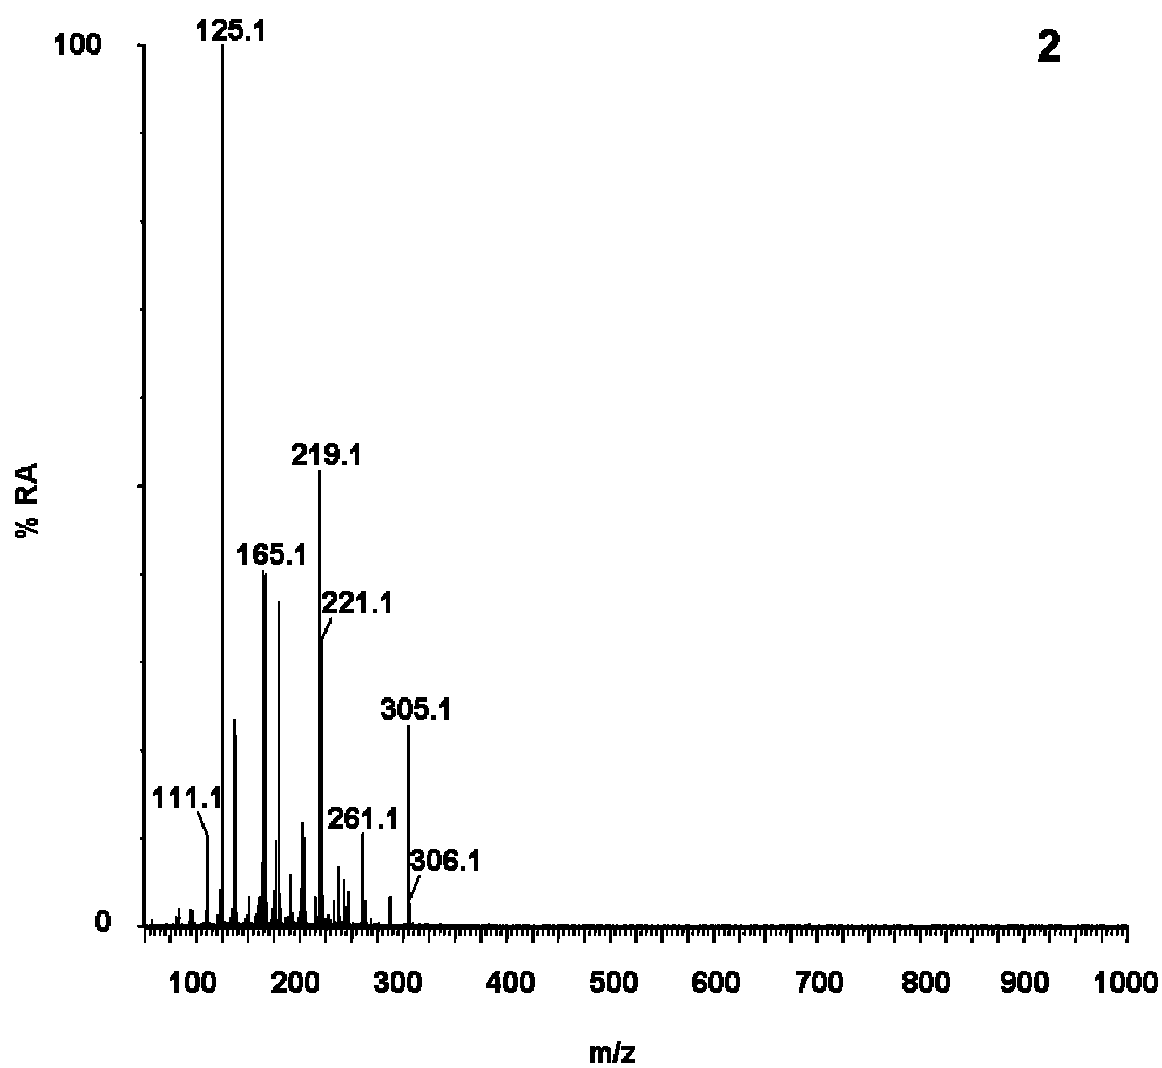

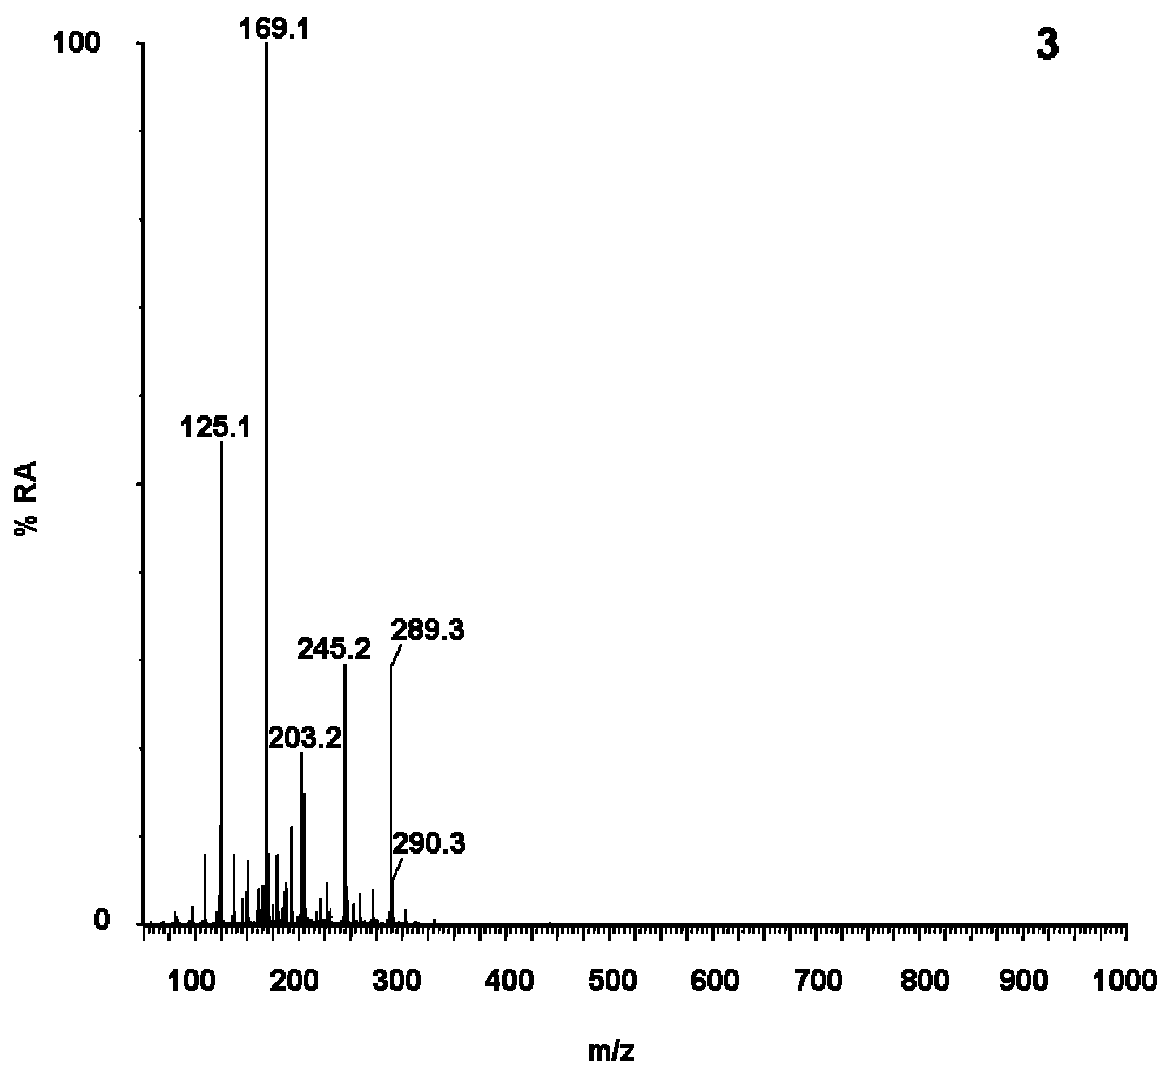

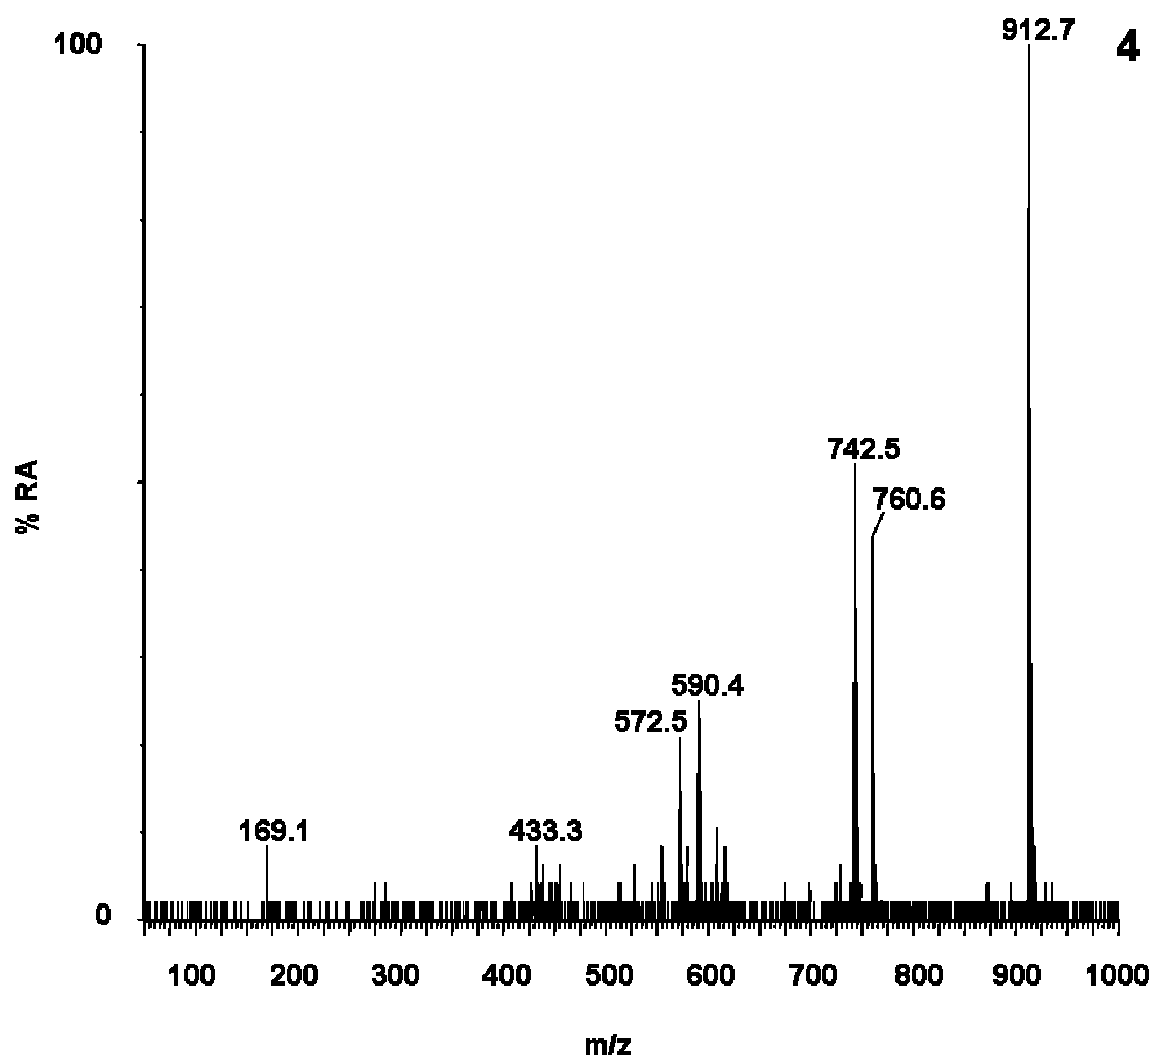

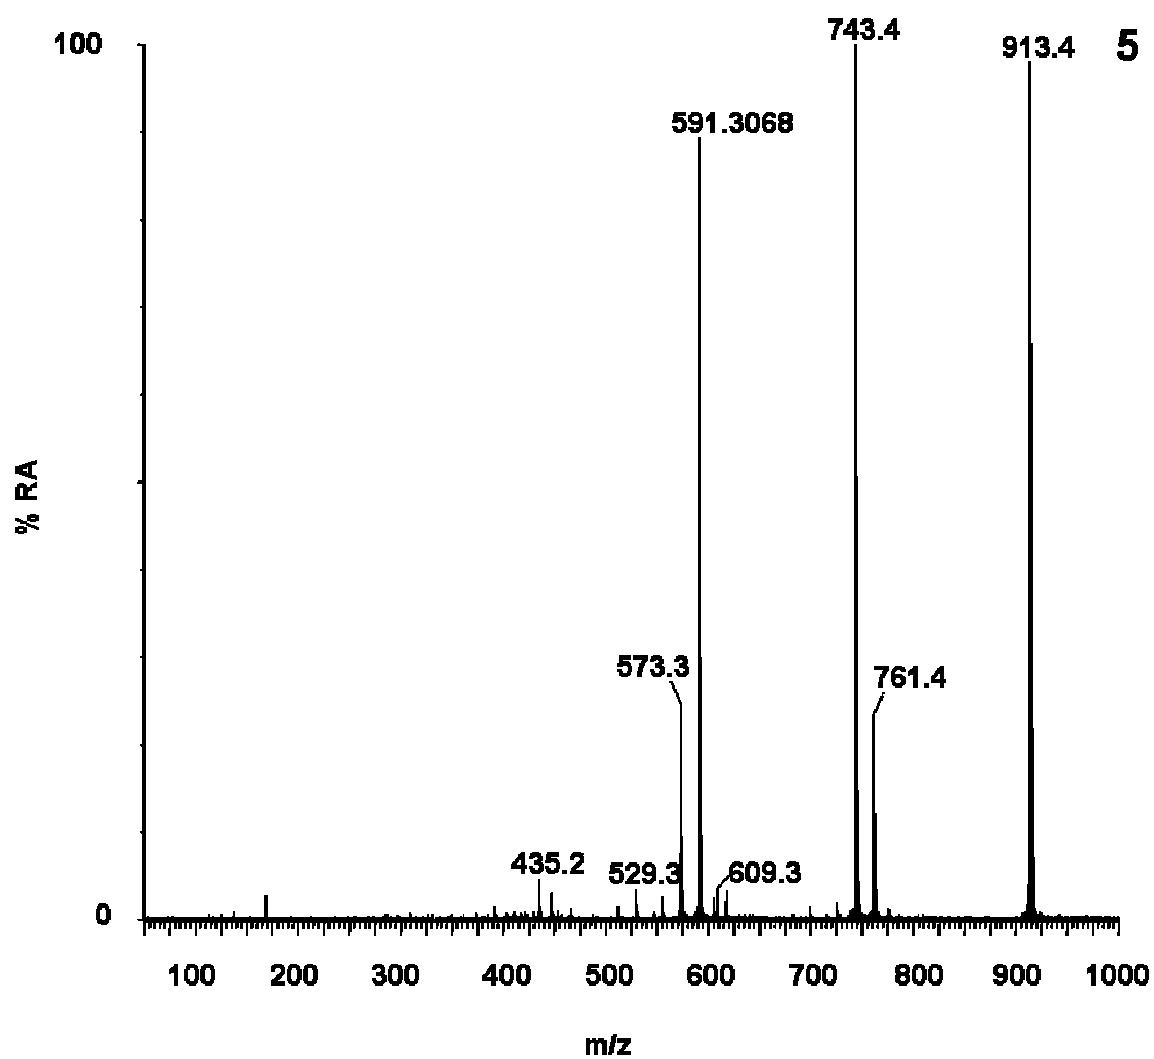

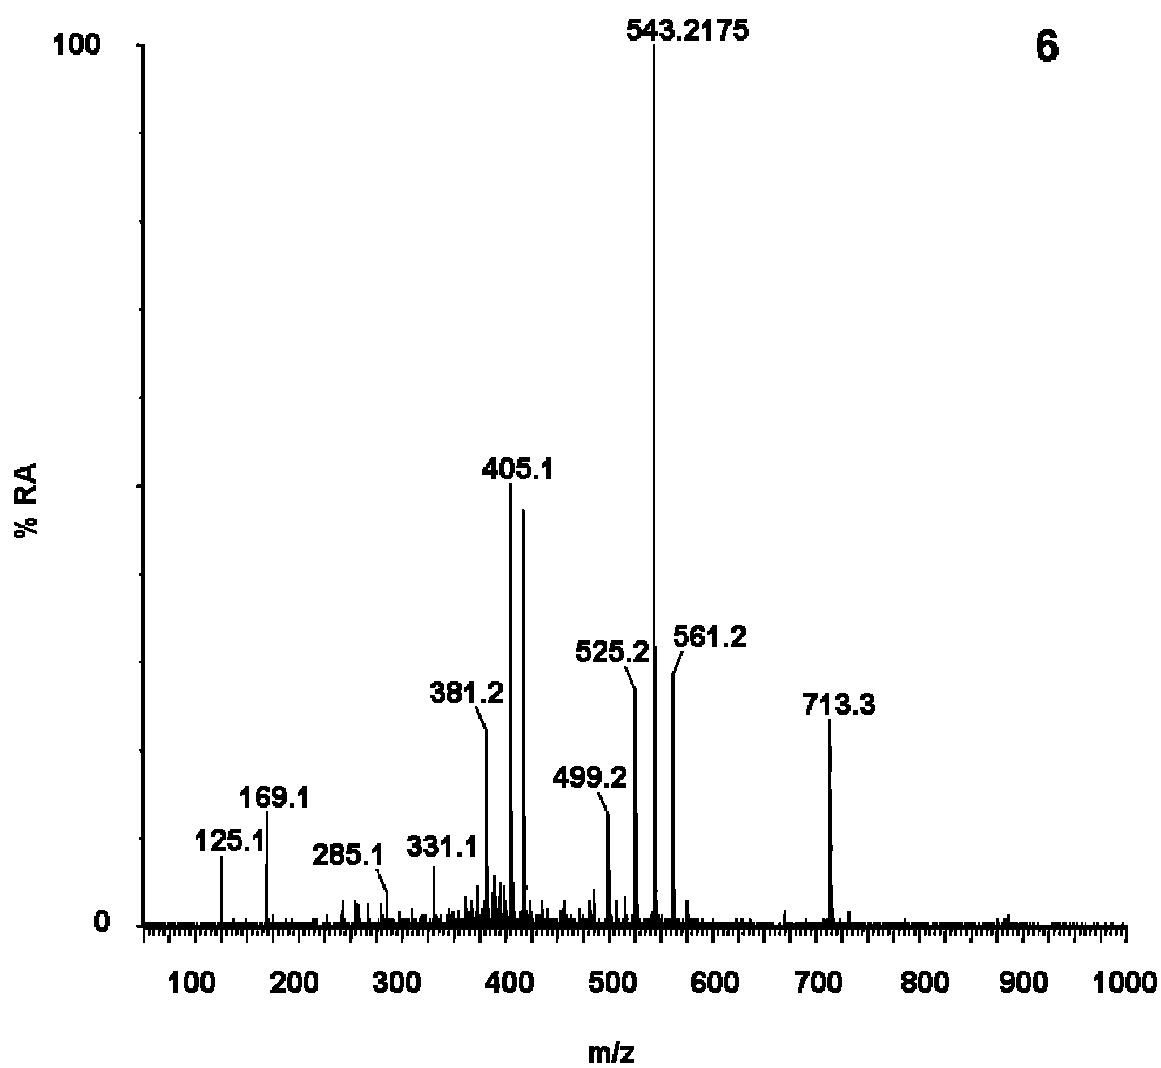

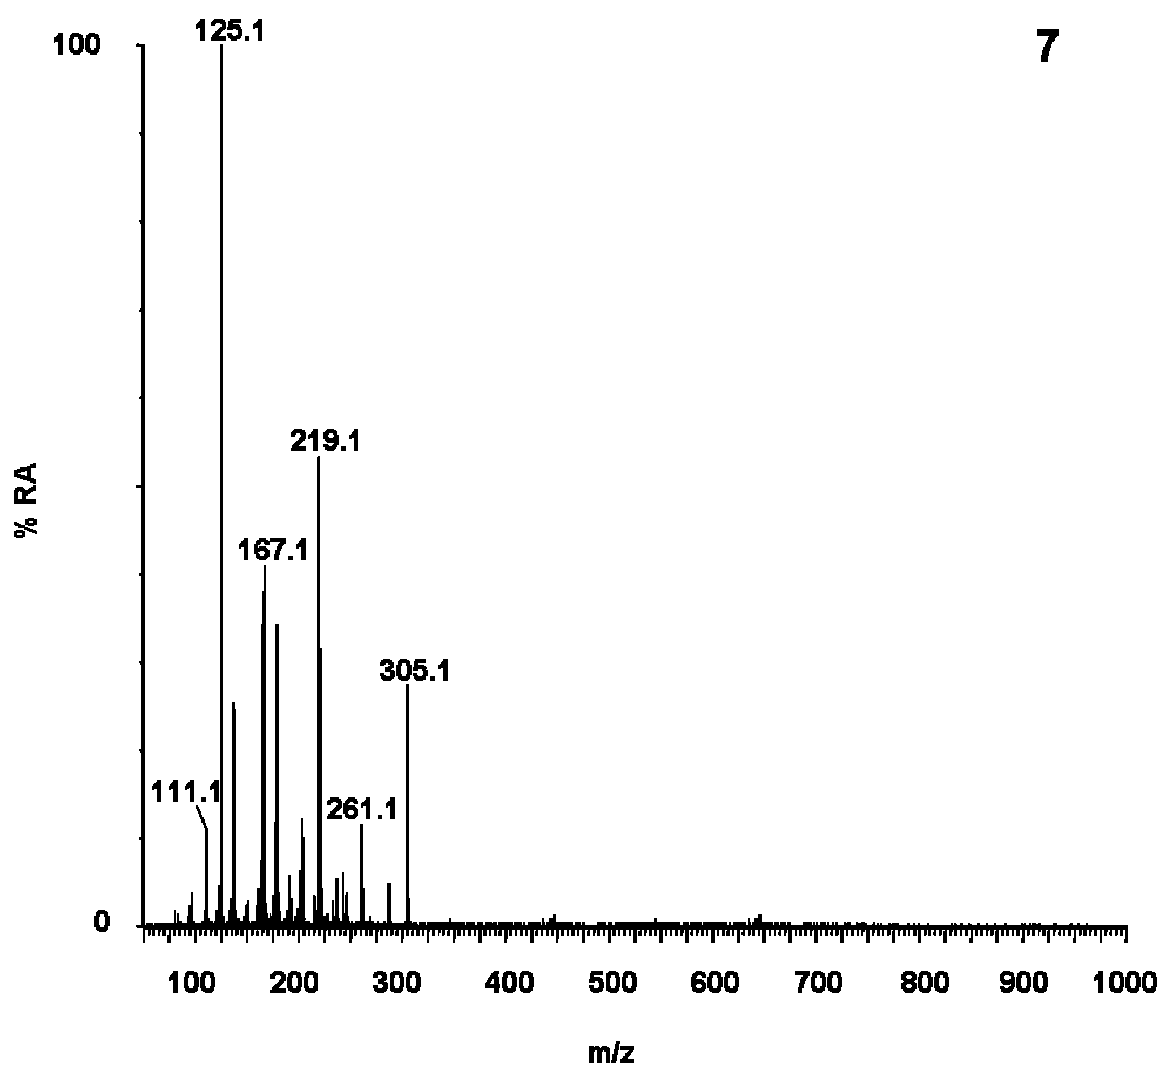



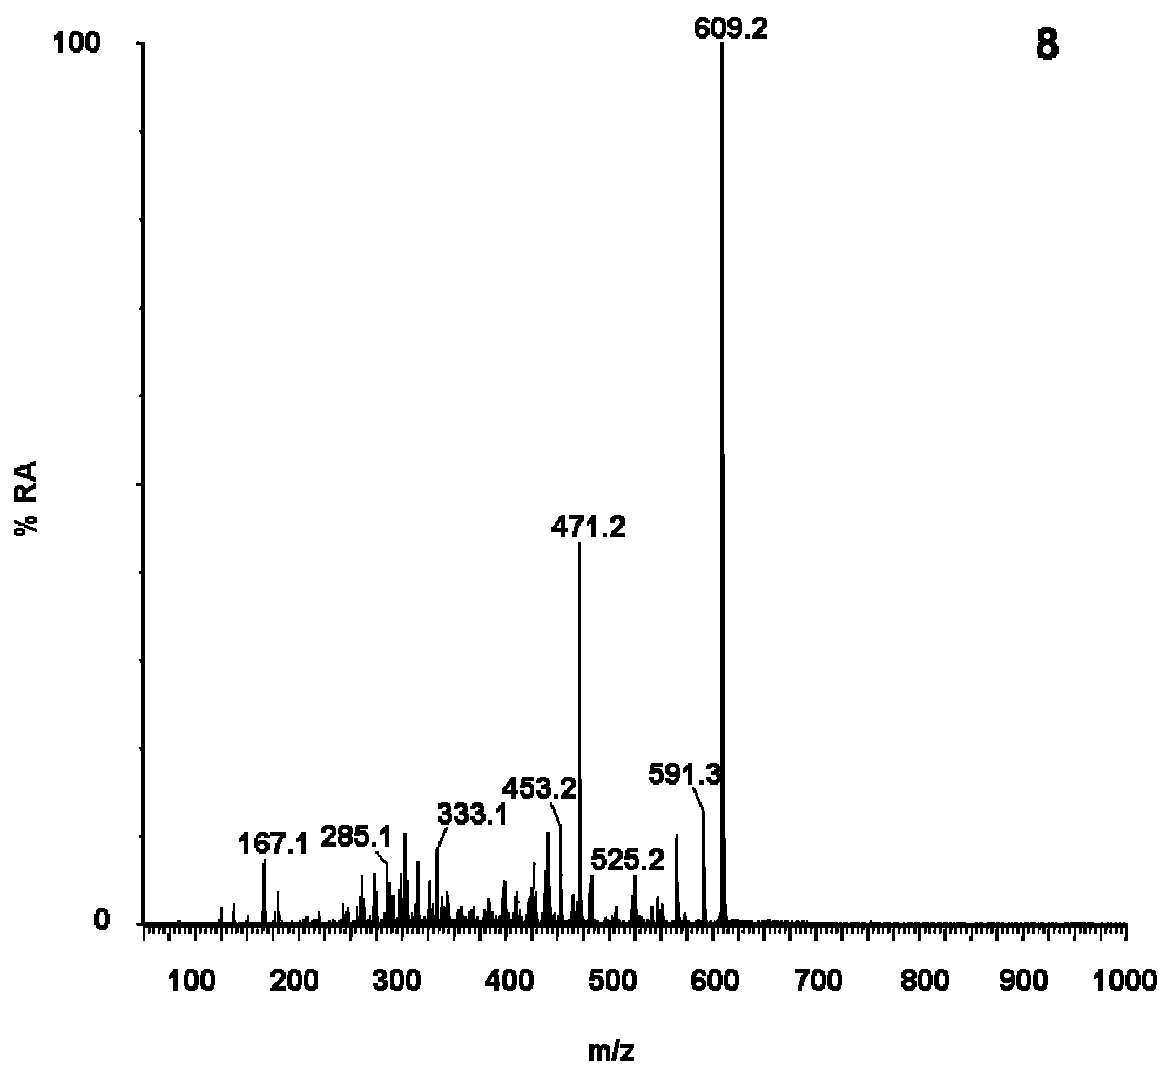

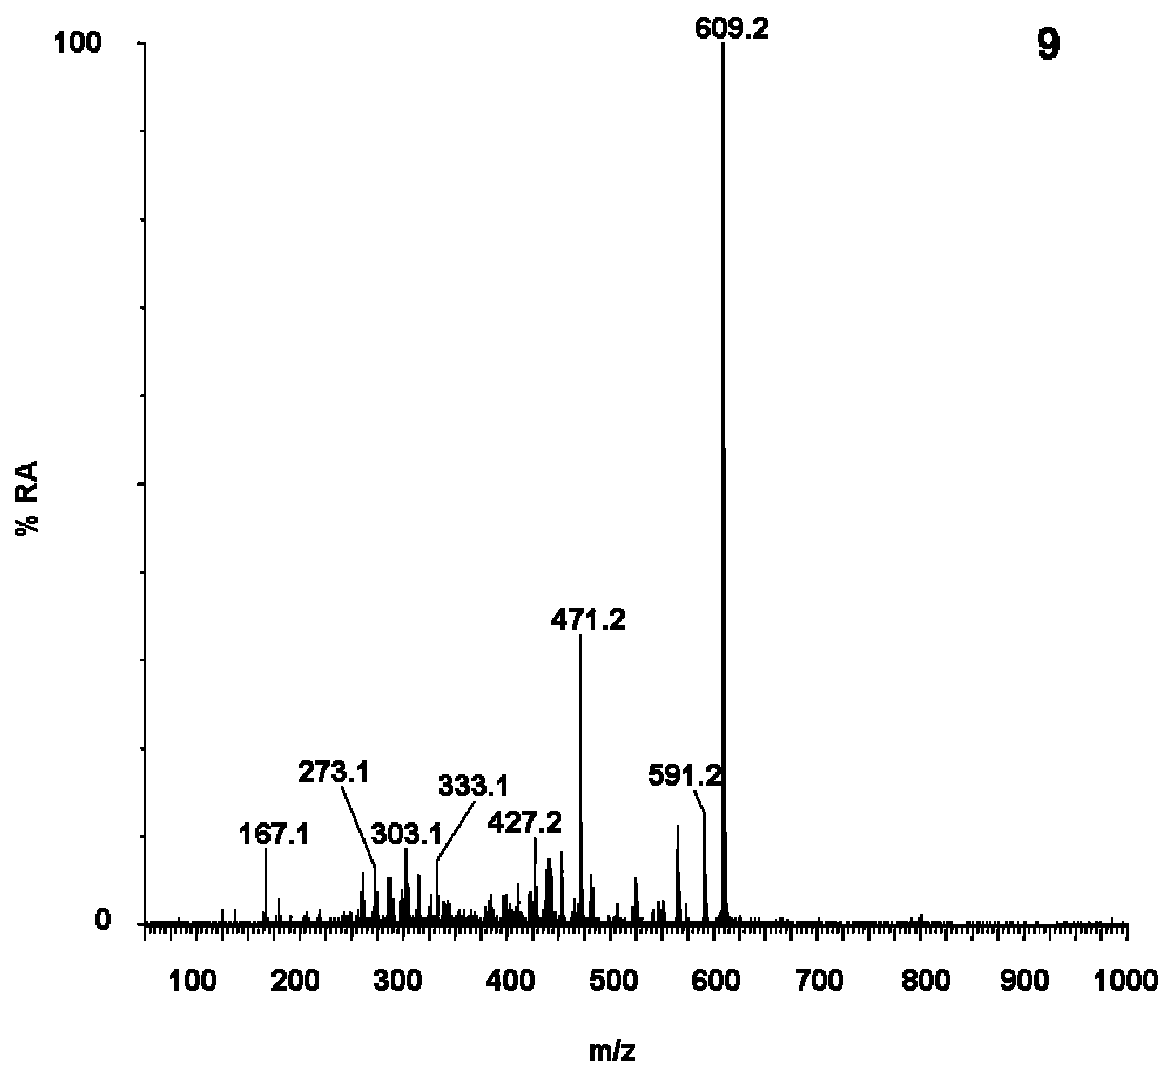

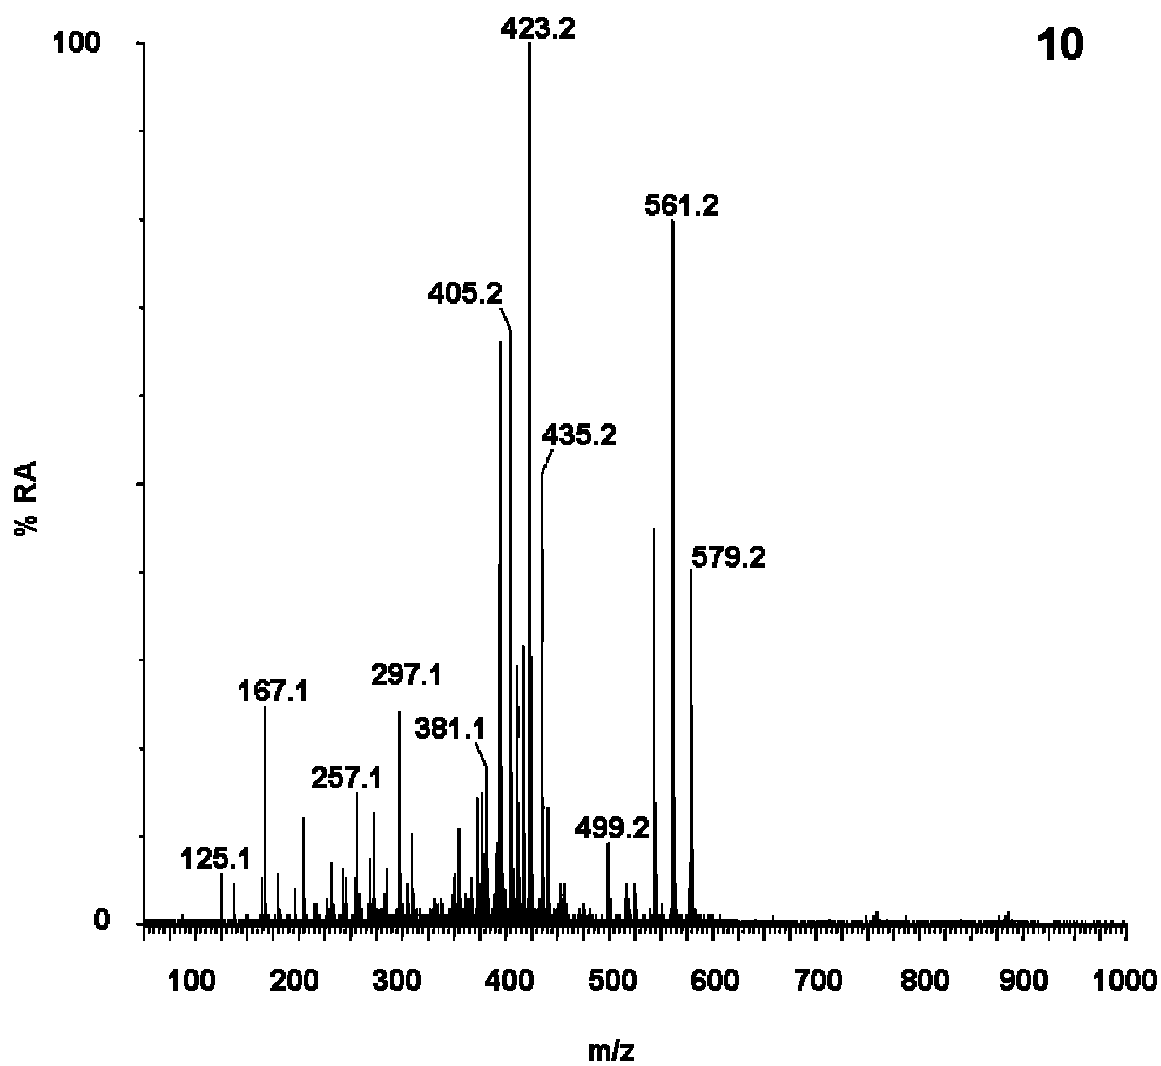

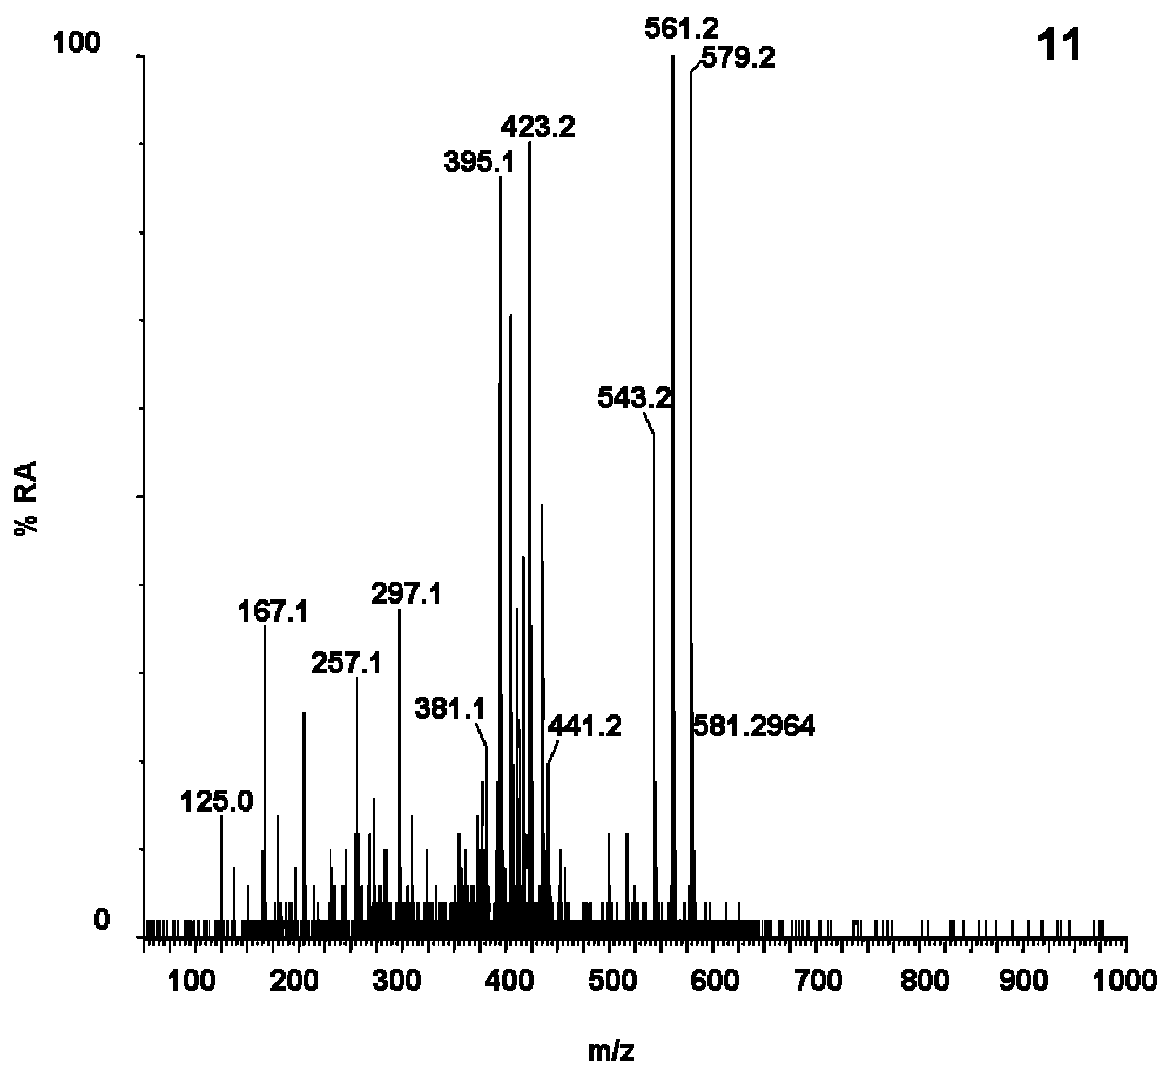

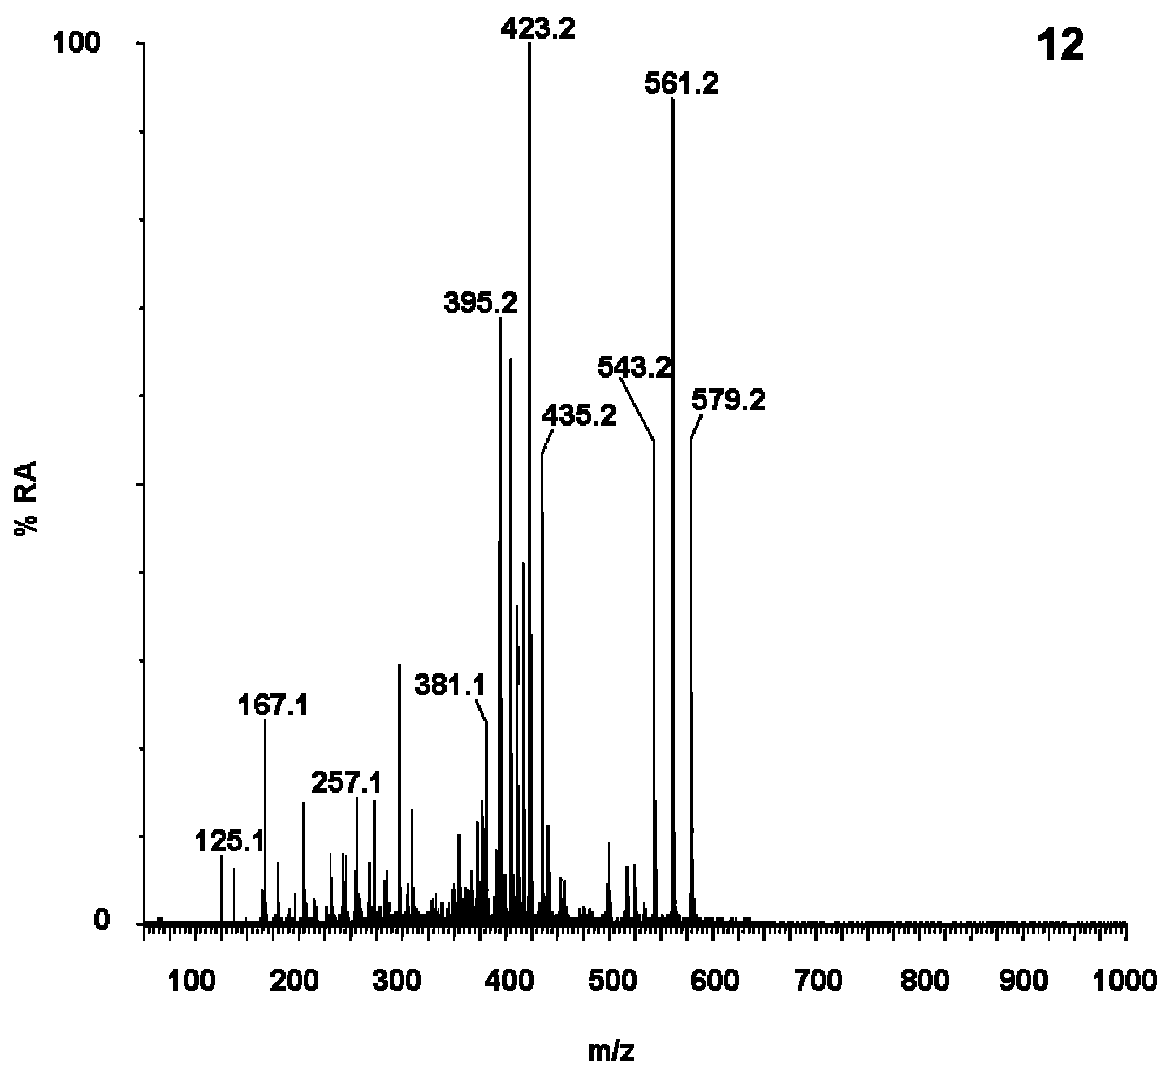

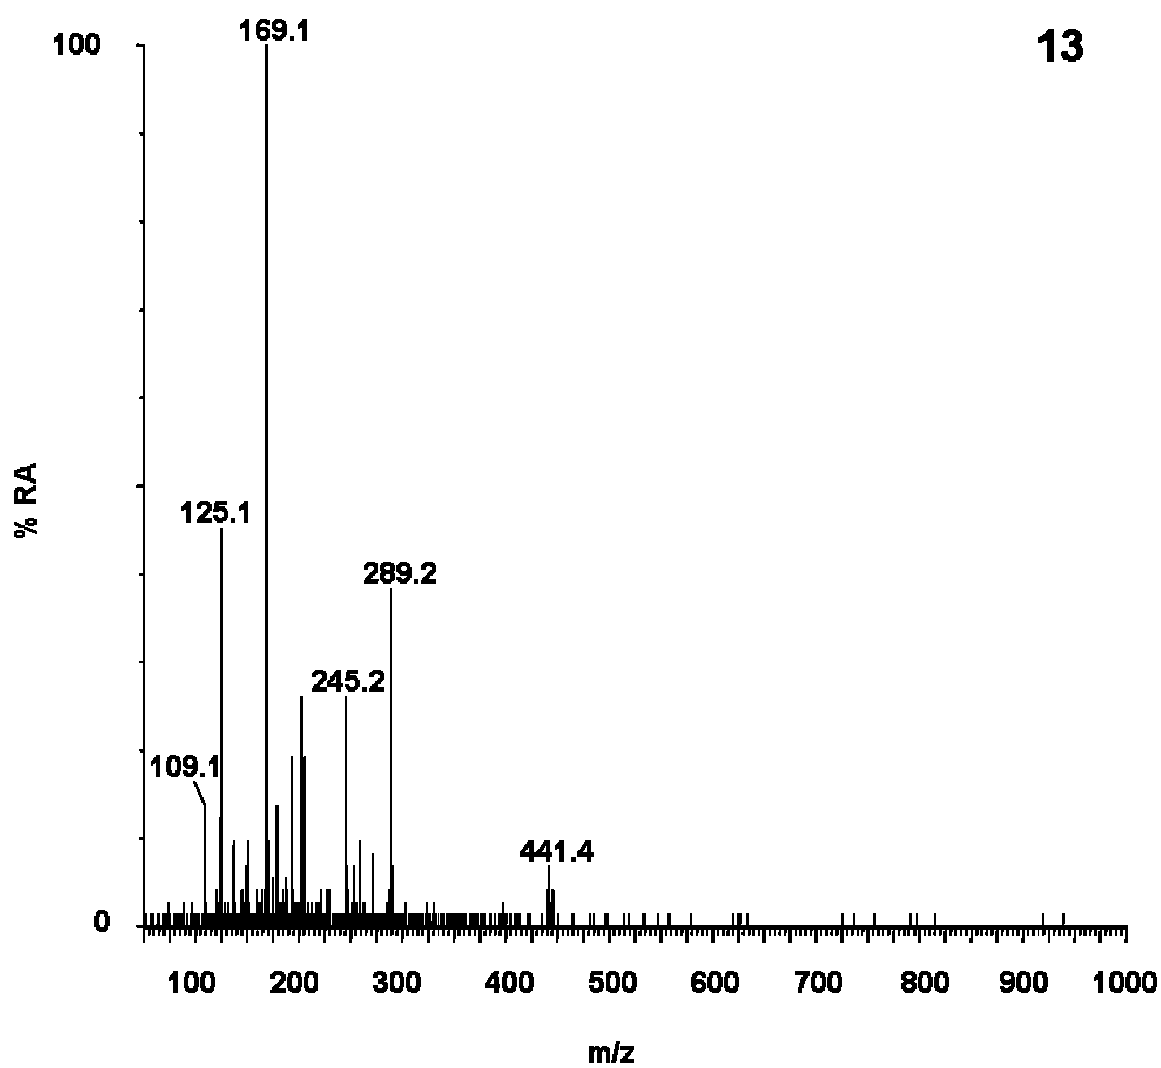

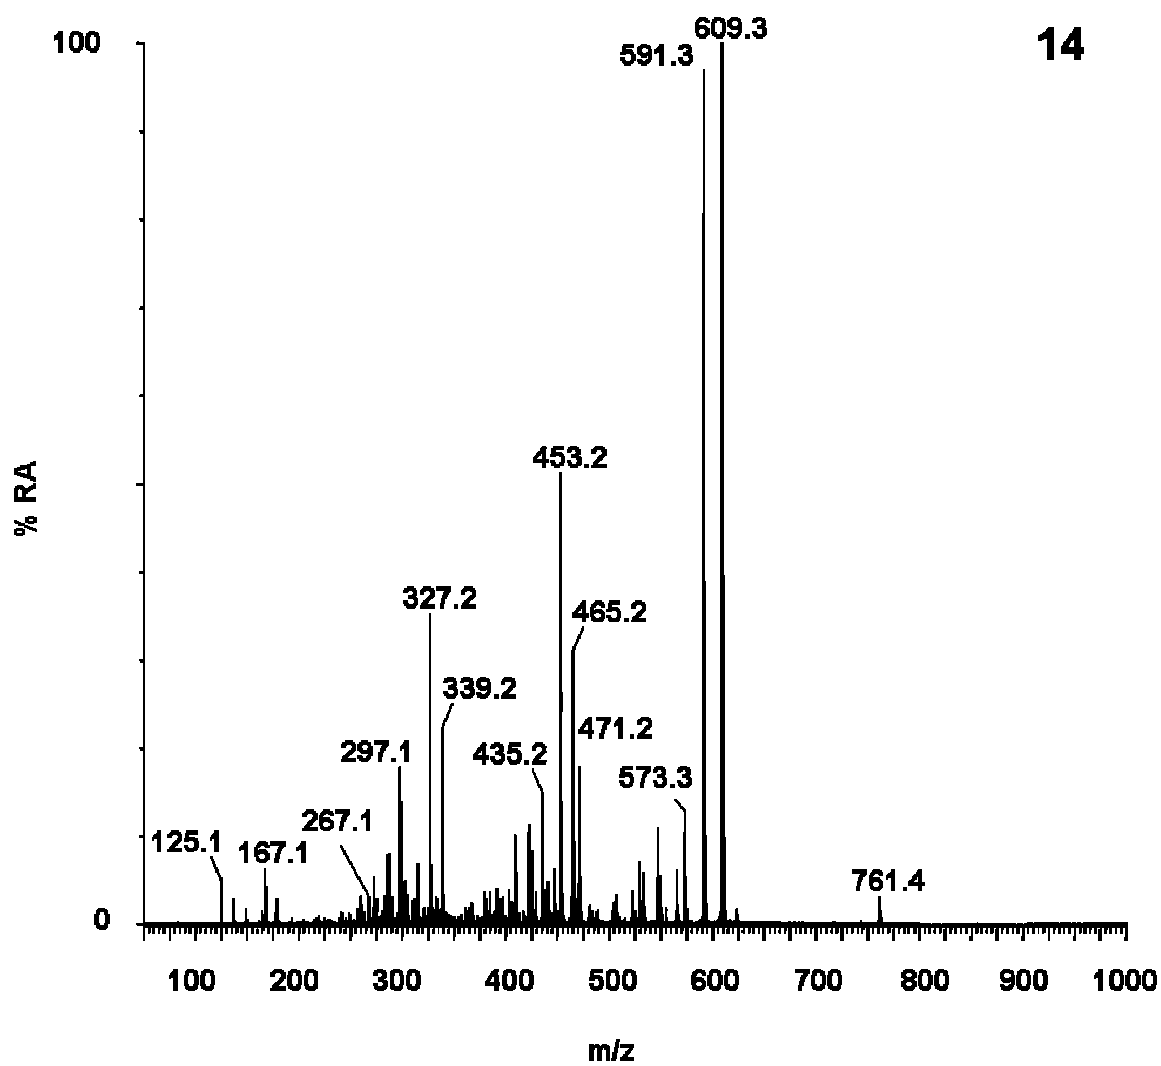

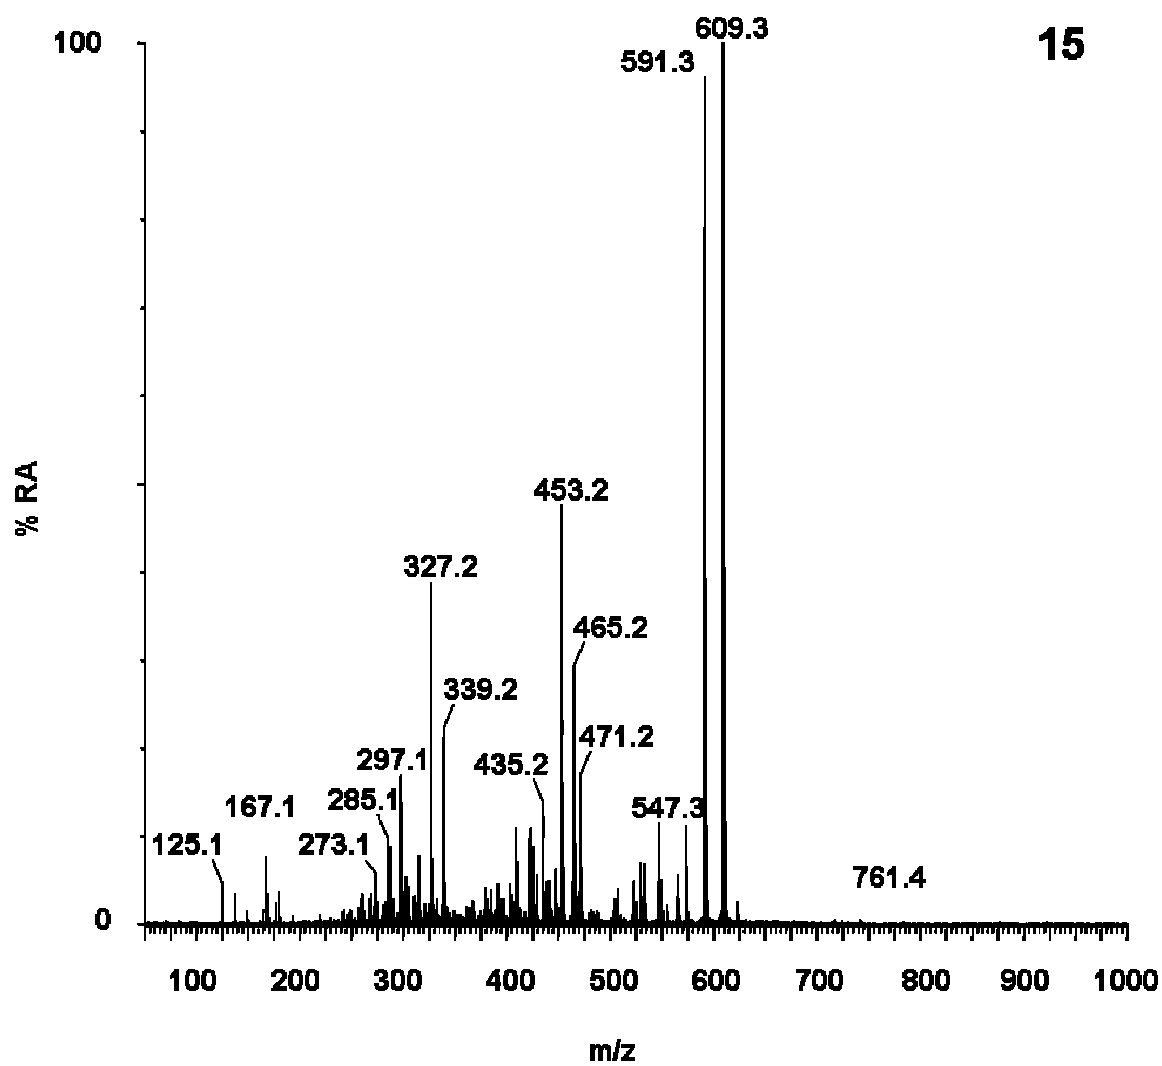



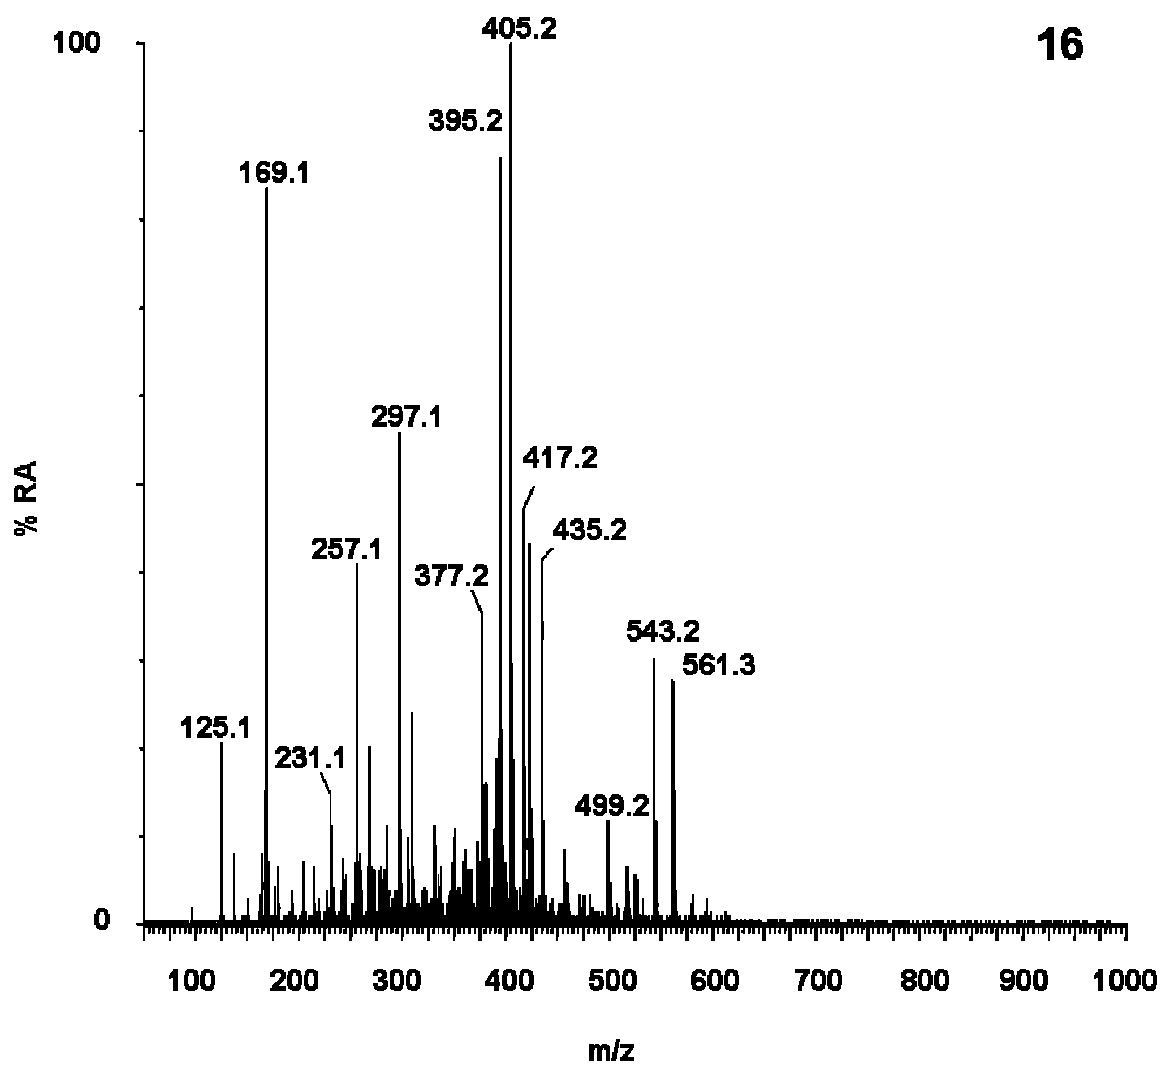

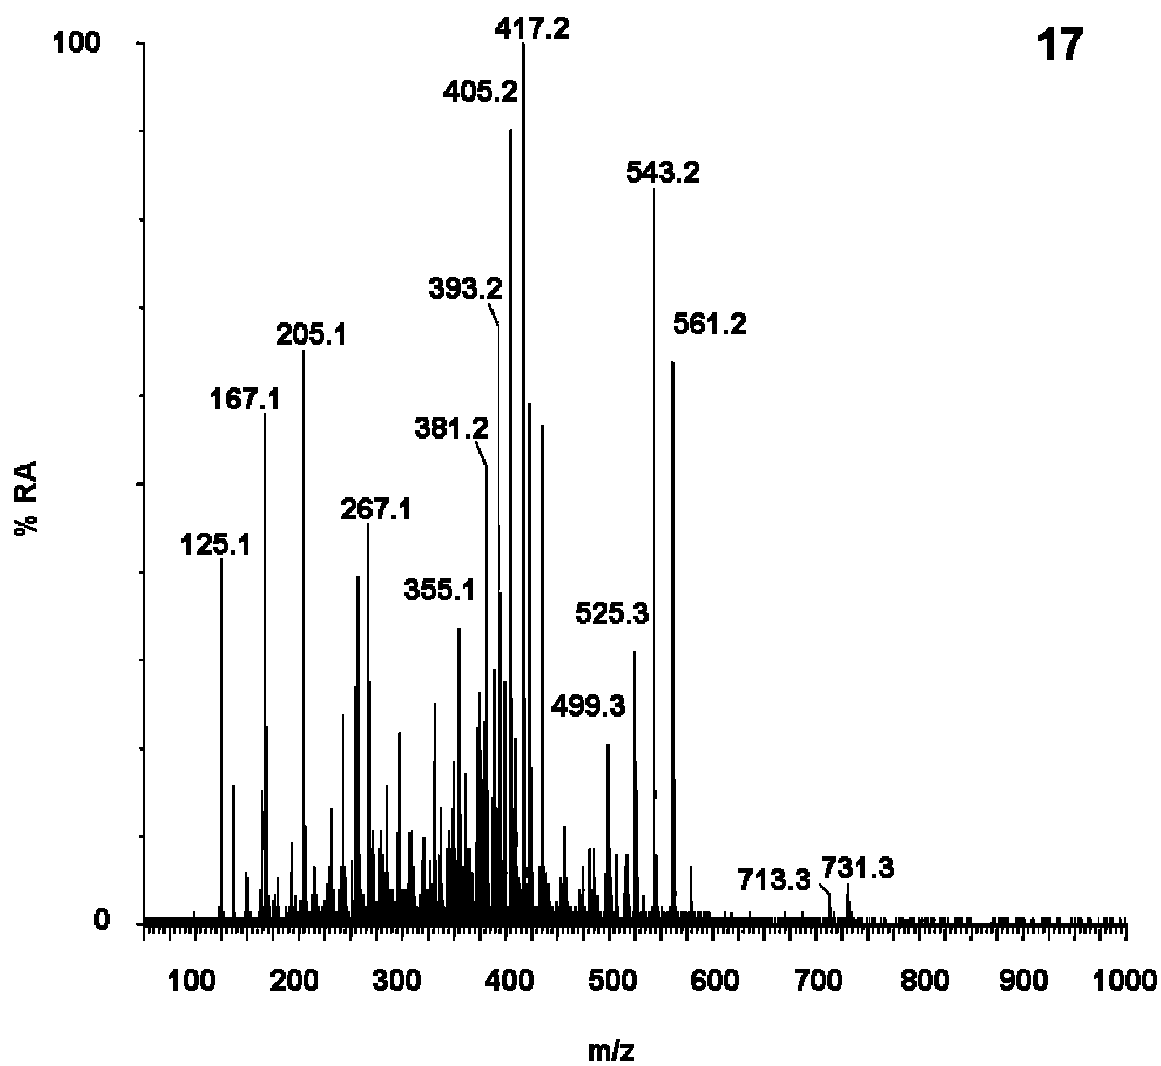

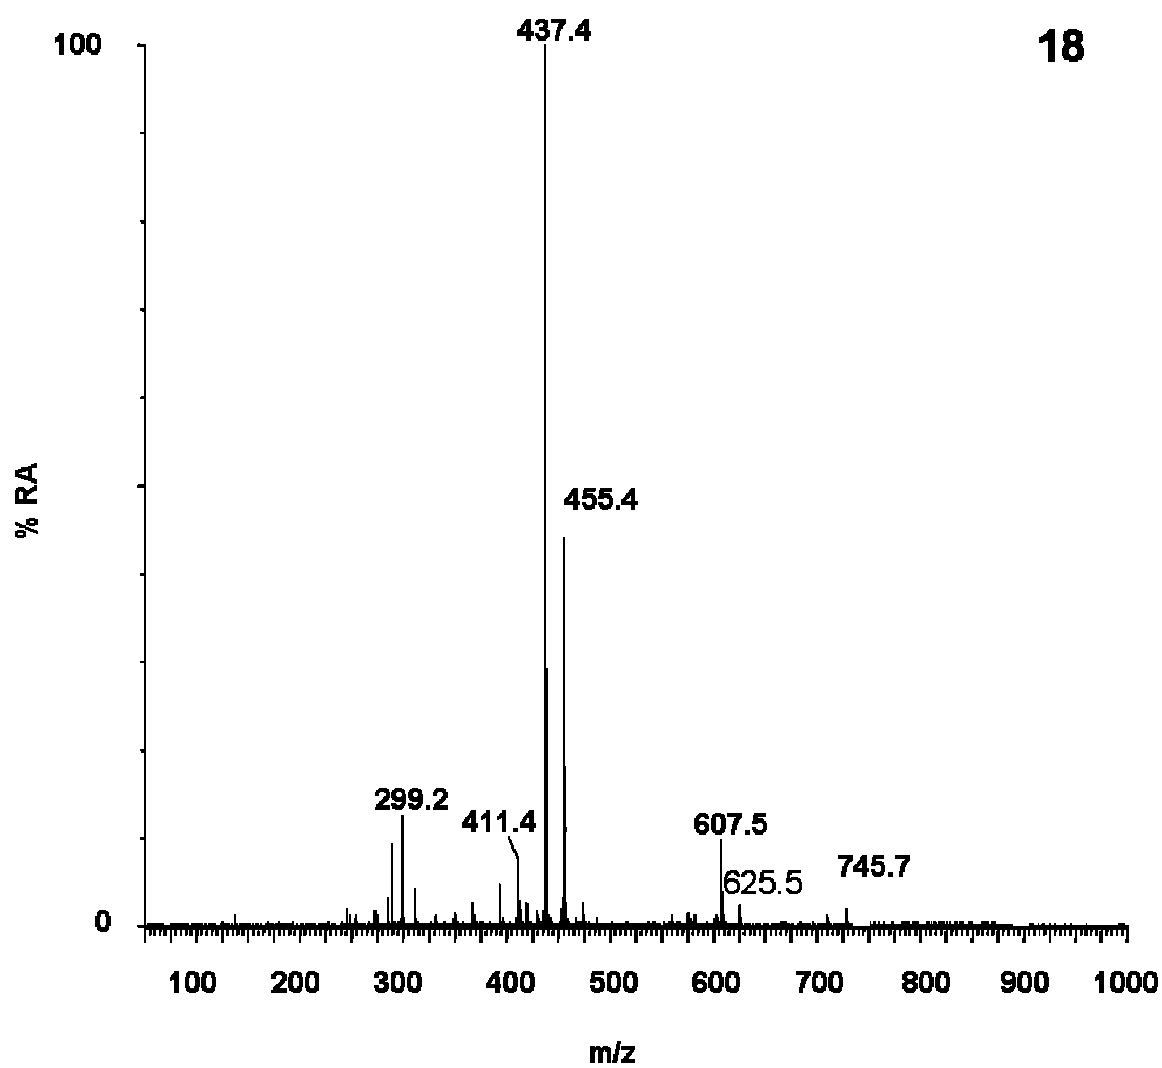

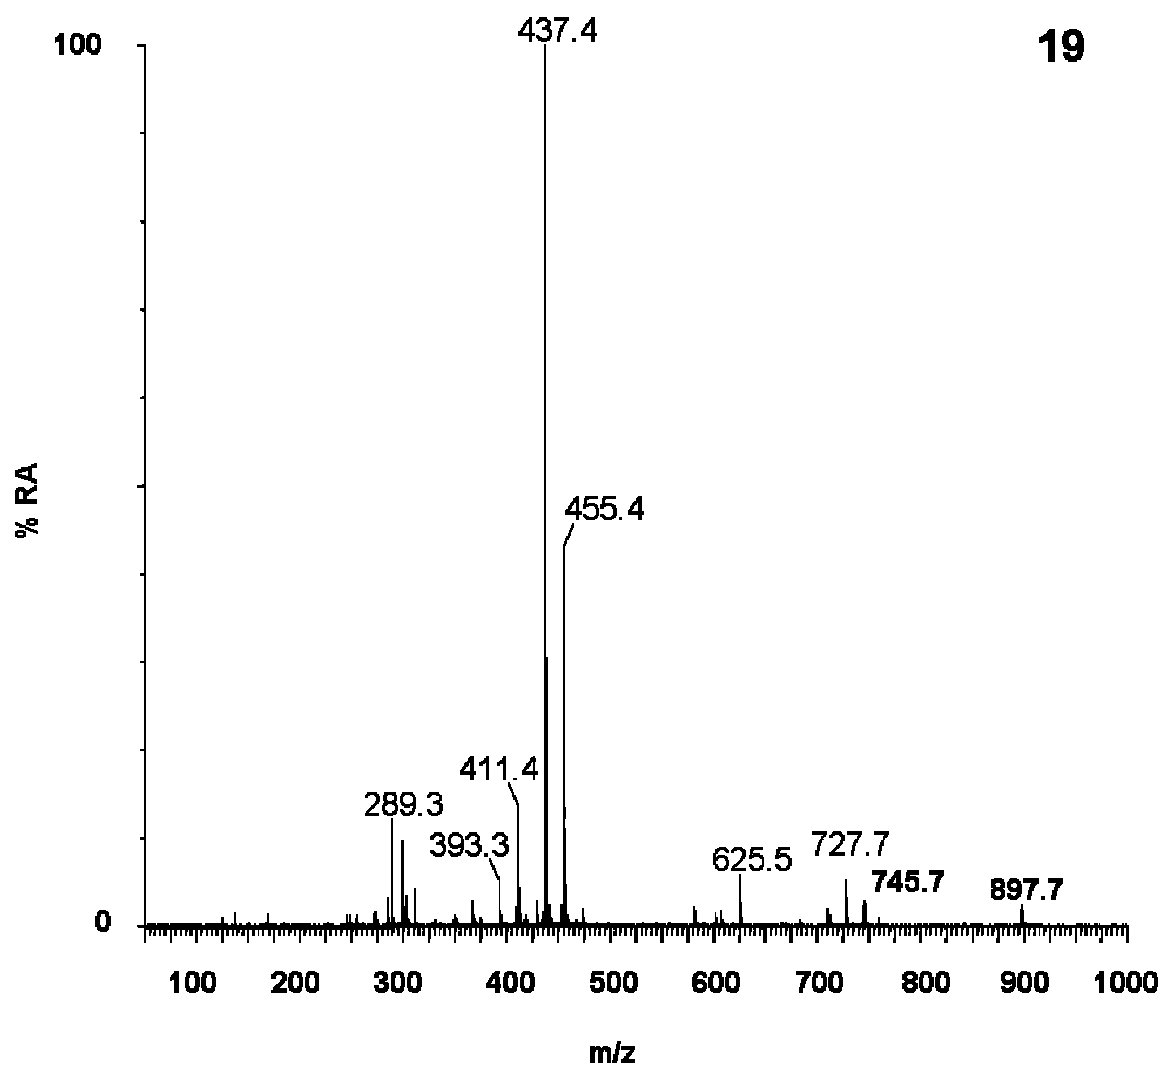

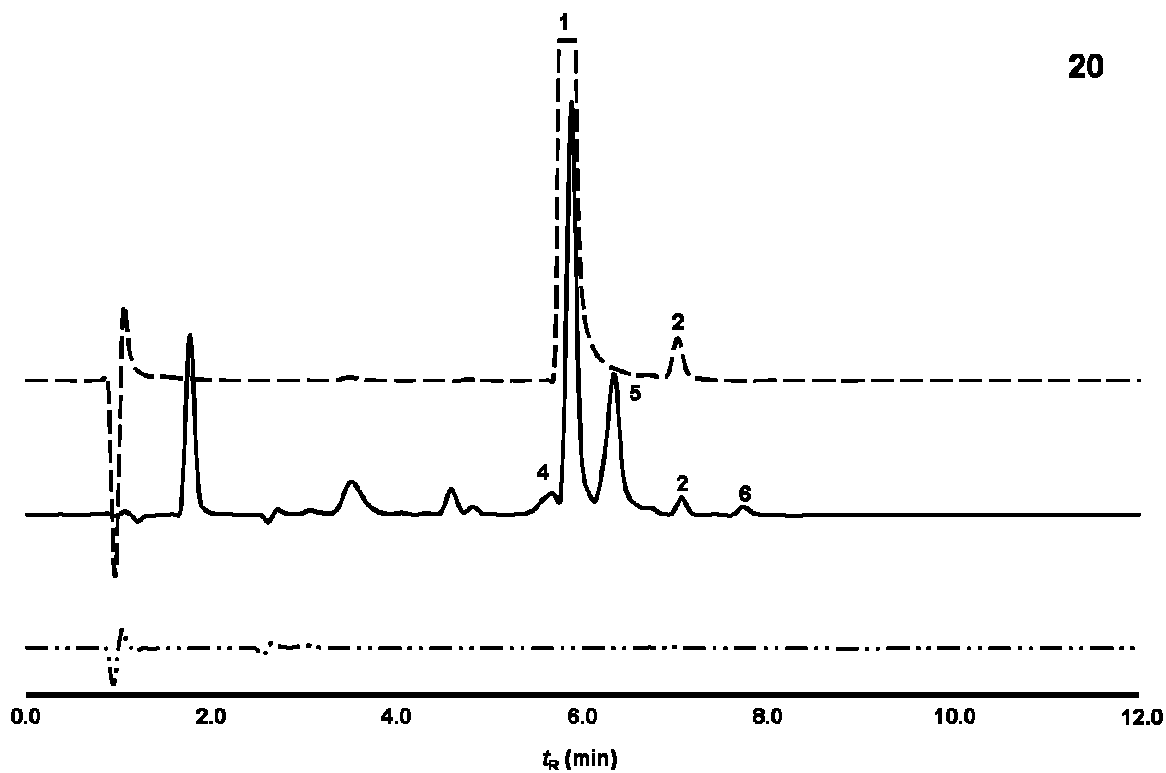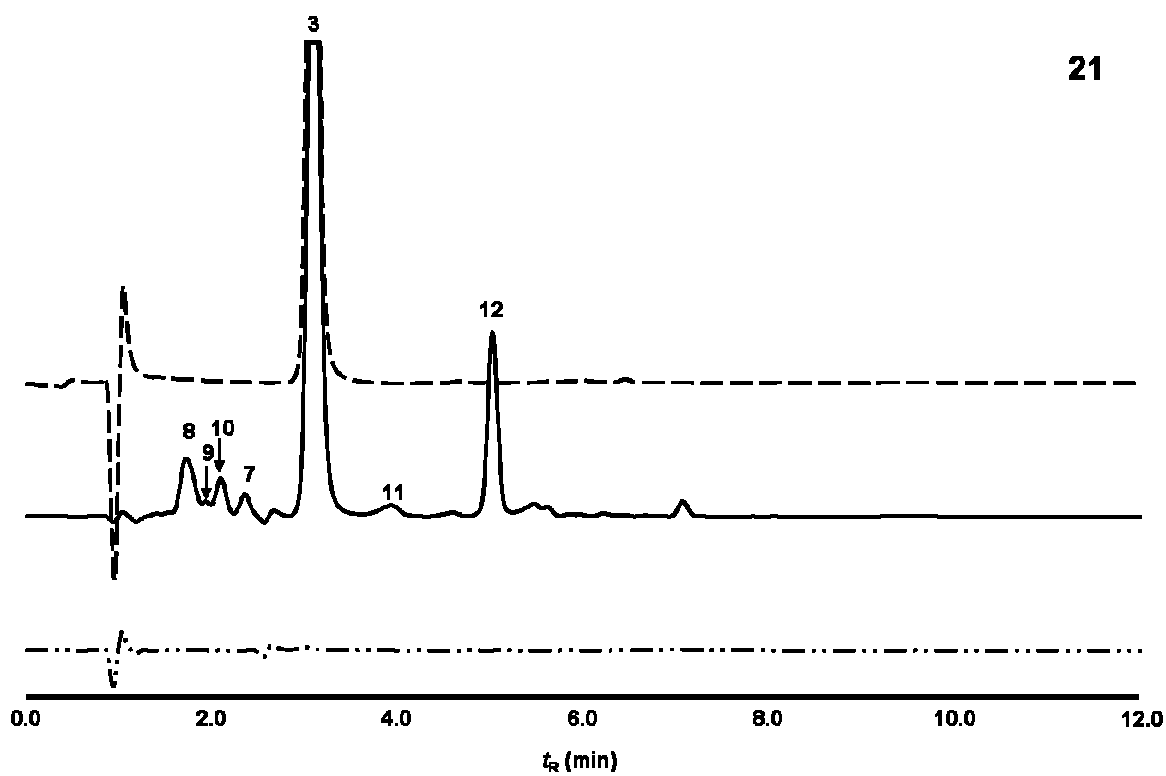

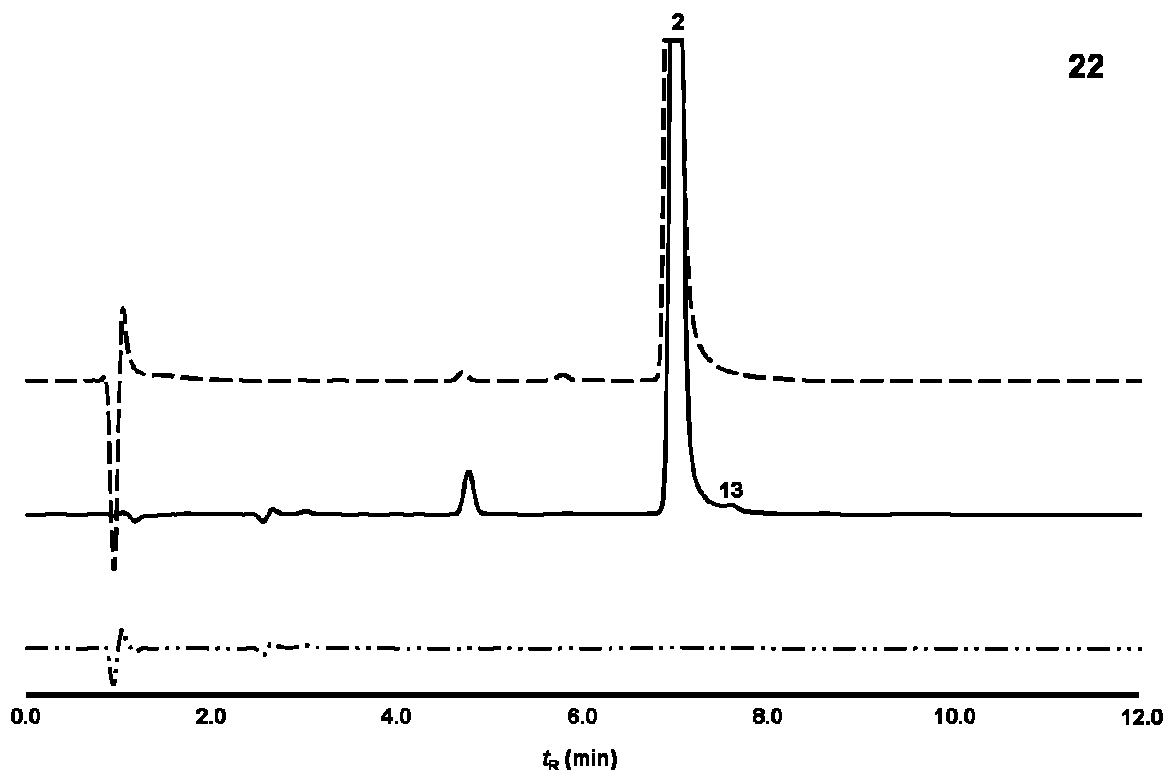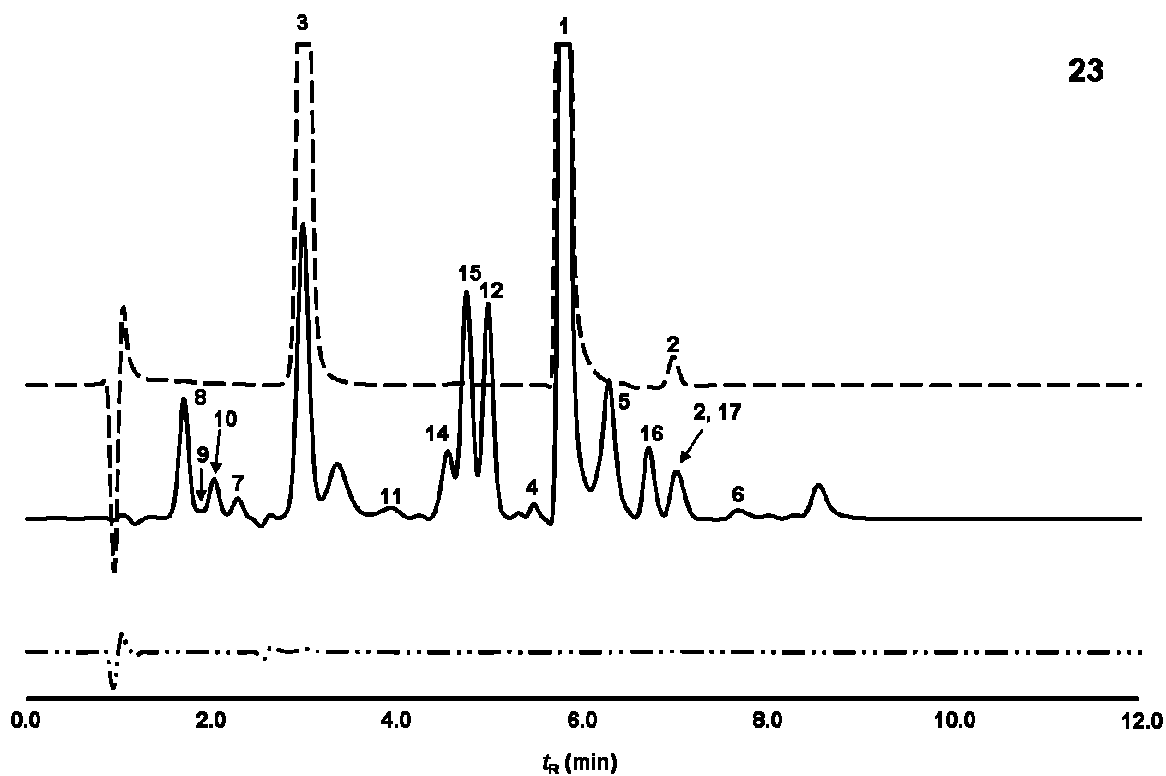

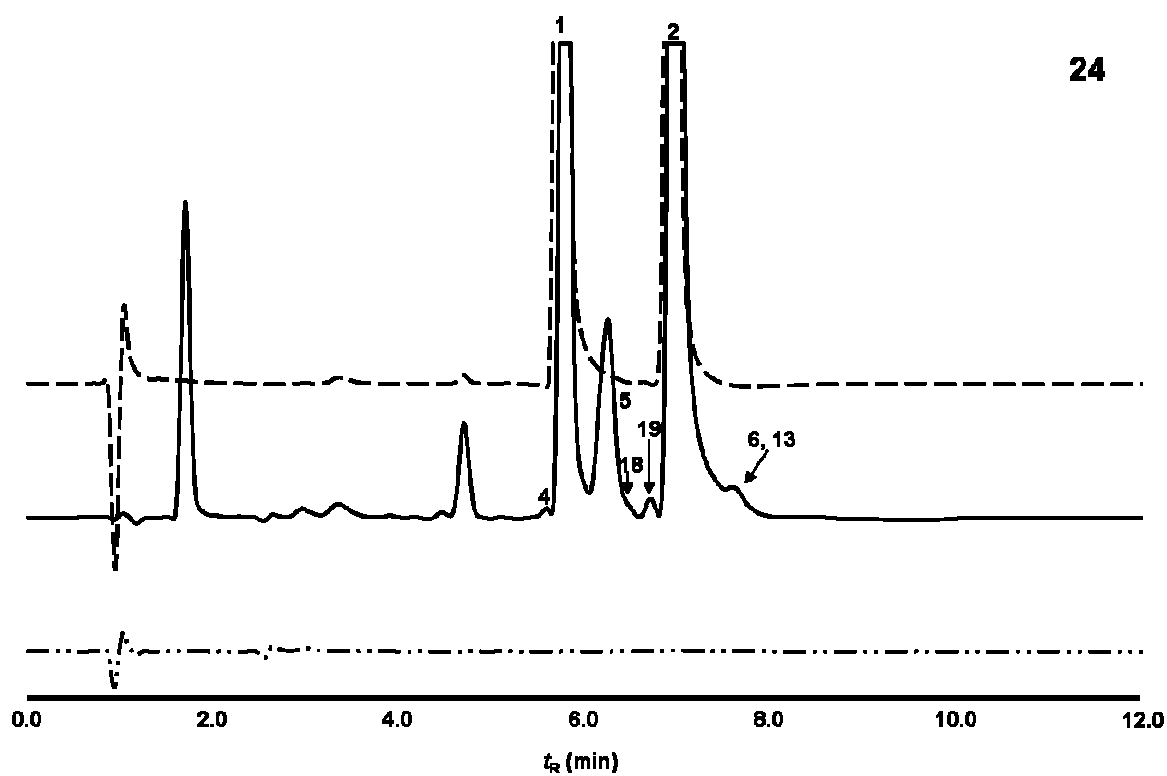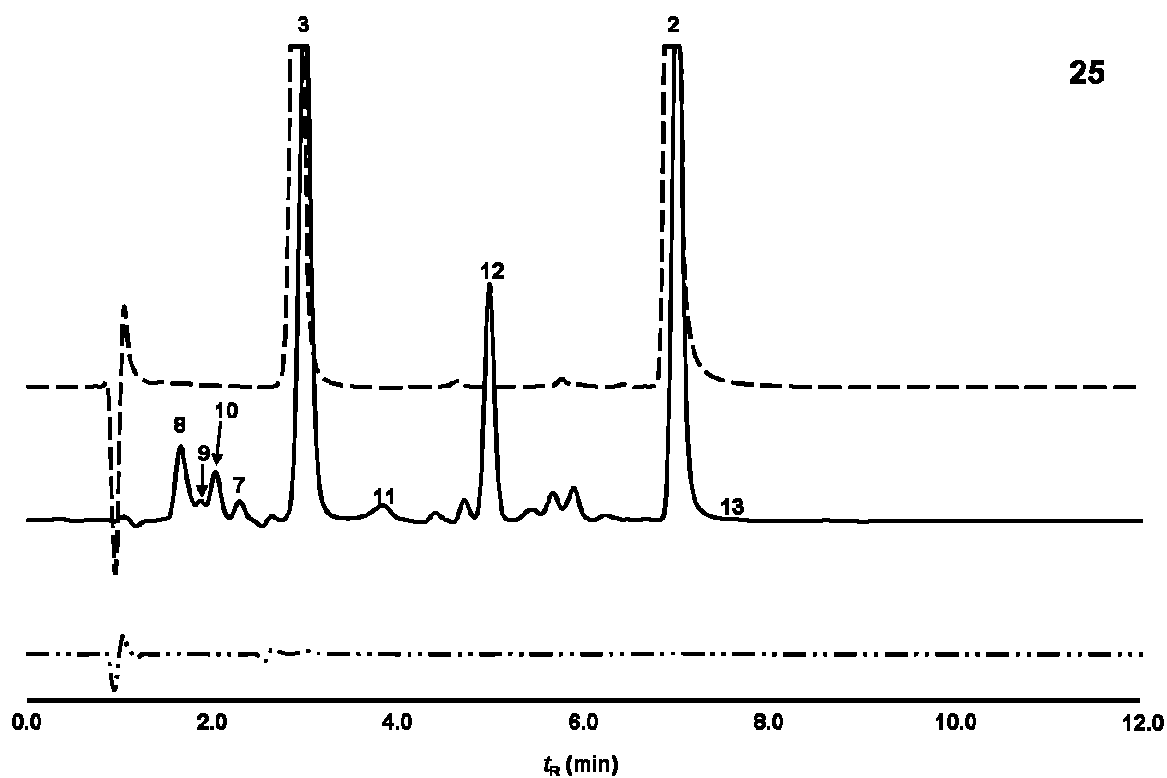

Supplement: Supplementary file 1 [file 4678309]
